# Supplementary material
Source: Springer Nature journal article supplement (https://www.springermedizin.de/resource/supplementary/12936_2010_1198_MOESM2_ESM.pdf/9549190)

**A****Microscopy**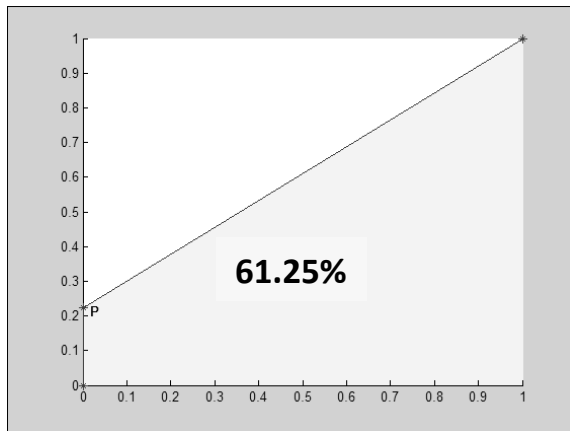**B****MaLDANN epidemiologic**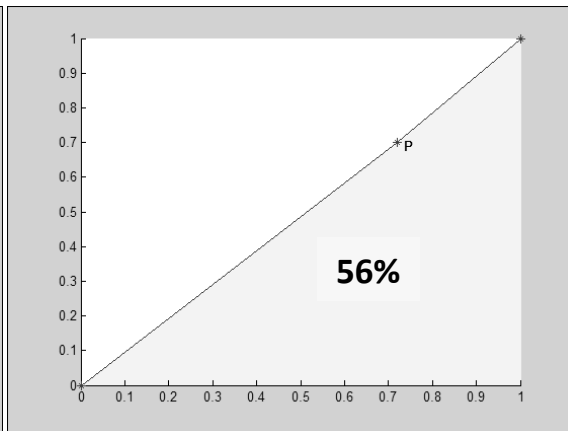**C****MaLDANN epidemiologic + cytokines**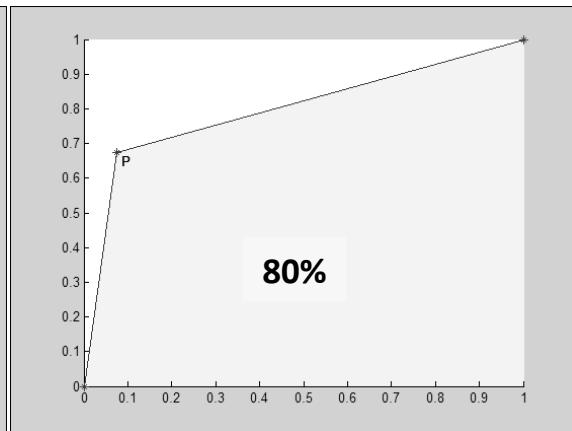**1-Specificity**

Supplement: MOESM2 [file 9549190]
